# Supplementary material
Source: publisher site journal article supplement (https://www.dovepress.com/article/428443)
Supplement: Supplementary file 1 [file get_supplementary_file.php]

## Supplemental tables

**Table e1.** Baseline characteristics.

**Table e2.** Changes in ODQ scores over 24 weeks.

**Table e3.** Multiple linear regression of baseline characteristics with ODQ scores and change from baseline of ODQ scores.

**Table e4.** Statistically significant correlations between ODQ scores and other clinical measures.

**Table e5.** Statistically significant correlations between change from baseline in ODQ and the changes in baseline in other clinical measures.

**Table e6.** Spearman correlation between ODQ Total score and sum of MADRS items related to emotional blunting across all visits.

**Table e1. Baseline characteristics (full analysis set)**

| Characteristics                  | N=116       |
|----------------------------------|-------------|
| Age in years, mean (SD)          | 38.4 (11.2) |
| Sex, female, n (%)               | 59 (50.9%)  |
| <b>History of MDD, mean (SD)</b> |             |
| Years since first MDD diagnosis  | 5.8 (5.9)   |
| Duration of current MDE, days    | 402 (728)   |
| Number of previous MDEs          | 1.3 (1.4)   |
| Prior suicide attempt, n (%)     | 6 (5.2%)    |

*MDE, major depressive episode*

**Table e2. Changes in ODQ scores over 24 weeks**

| LS Mean [95% CI]            | Week 8 (N=112)               | Week 12 (N=110)               | Week 24 (N=102)                 |
|-----------------------------|------------------------------|-------------------------------|---------------------------------|
| ODQ Total                   | -5.8 [-8.9, -2.7]<br>P<0.001 | -8.5 [-12.7, -4.4]<br>P<0.001 | -13.0 [-17.1, -8.9]<br>P<0.001  |
| ODQ Section 1+2             | -6.3 [-8.6, -4.0]<br>P<0.001 | -9.3 [-12.2, -6.4]<br>P<0.001 | -12.9 [-15.7, -10.1]<br>P<0.001 |
| ODQ General reduction       | -1.0 [-1.7, -0.4]<br>P<0.01  | -2.0 [-2.7, -1.2]<br>P<0.001  | -2.6 [-3.4, -1.8]<br>P<0.001    |
| ODQ Positive reduction      | -2.6 [-3.4, -1.8]<br>P<0.001 | -3.1 [-4.0, -2.2]<br>P<0.001  | -4.4 [-5.3, -3.5]<br>P<0.001    |
| ODQ Emotional detachment    | -1.3 [-2.0, -0.6]<br>P<0.001 | -1.9 [-2.6, -1.2]<br>P<0.001  | -2.5 [-3.2, -1.8]<br>P<0.001    |
| ODQ Not caring              | -1.3 [-2.0, -0.7]<br>P<0.001 | -2.3 [-3.1, -1.5]<br>P<0.001  | -3.4 [-4.2, -2.6]<br>P<0.001    |
| ODQ Antidepressant as cause | 0.2 [-0.5, 0.8]<br>NS        | -0.3 [-1.0, -0.4]<br>NS       | -1.3 [-2.1, -0.5]<br>P<0.01     |

*Results derived using a REML-based MMRM. The inferential model includes baseline age, sex, visit, baseline score, and baseline score by visit interaction as the fixed factors*

**Table e3. Multiple linear regression of baseline characteristics with ODQ scores and change from baseline of ODQ scores**

| Baseline Characteristics                                 | Week 12                             |                                          | Week 24                       |                                          |
|----------------------------------------------------------|-------------------------------------|------------------------------------------|-------------------------------|------------------------------------------|
|                                                          | ODQ Total score<br>$\beta$ [95% CI] | Change from Baseline<br>$\beta$ [95% CI] | ODQ score<br>$\beta$ [95% CI] | Change from Baseline<br>$\beta$ [95% CI] |
| <b>Sample Size (n)</b>                                   | <b>106</b>                          | <b>68</b>                                | <b>97</b>                     | <b>67</b>                                |
| Age (per year)                                           | 0.43<br>[0.00, 0.86]                | 0.22<br>[-0.27, 0.72]                    | 0.41<br>[-0.07, 0.88]         | 0.27<br>[-0.24, 0.79]                    |
| Female vs. male                                          | -0.08<br>[-8.82, 8.66]              | 1.91<br>[-7.79, 11.61]                   | 3.02<br>[-6.40, 12.43]        | 6.05<br>[-3.76, 15.87]                   |
| Duration of current episode (per month)                  | 0.04<br>[-0.14, 0.21]               | 0.03<br>[-0.15, 0.21]                    | 0.00<br>[-0.19, 0.20]         | 0.02<br>[-0.16, 0.20]                    |
| Years since first MDD (per year)                         | 0.51<br>[-0.36, 1.38]               | -0.17<br>[-1.09, 0.74]                   | 0.36<br>[-0.54, 1.26]         | -0.25<br>[-1.18, 0.68]                   |
| Number of MDE (per episode)                              | -2.10<br>[-5.87, 1.68]              | -2.89<br>[-6.56, 0.79]                   | -1.34<br>[-5.12, 2.44]        | -1.70<br>[-5.35, 1.95]                   |
| Any suicidal attempts Yes vs. No                         | -9.36<br>[-27.59, 8.87]             | -4.00<br>[-23.88, 15.88]                 | -3.37<br>[-21.48, 14.74]      | 2.97<br>[-16.98, 22.92]                  |
| Antidepressant prescribed before vortioxetine Yes vs. No | 2.63<br>[-6.09, 11.35]              | 3.43<br>[-14.81, 21.67]                  | 3.49<br>[-5.95, 12.94]        | -1.92<br>[-20.31, 16.48]                 |
| MADRS total score (per SD)                               | 7.94<br>[3.38, 12.51]               | -2.30<br>[-6.94, 2.33]                   | 7.87<br>[3.11, 12.63]         | -2.91<br>[-7.58, 1.76]                   |

**Table e4. Statistically significant correlations between ODQ scores and other clinical measures**

| Measure                       | ODQ        |        |         |         |
|-------------------------------|------------|--------|---------|---------|
|                               | Baseline   | Week 8 | Week 12 | Week 24 |
| WPAI Presenteeism             | 0.302      | 0.514  | 0.589   | 0.440   |
| WPAI Productivity Loss        | 0.274 (NS) | 0.452  | 0.580   | 0.468   |
| WPAI Activity Impairment      | 0.454      | 0.517  | 0.627   | 0.578   |
| MADRS Total Score             | 0.576      | 0.560  | 0.714   | 0.654   |
| MADRS Anhedonia Factor Score  | 0.524      | 0.535  | 0.692   | 0.639   |
| CGI-S Score                   | 0.608      | 0.562  | 0.622   | 0.594   |
| CGI-C Score                   | N/A        | 0.334  | 0.474   | 0.351   |
| PGI-C                         | N/A        | 0.307  | 0.570   | 0.445   |
| SDS Total Score               | 0.519      | 0.599  | 0.676   | 0.637   |
| SDS Work/School Score         | 0.350      | 0.453  | 0.562   | 0.501   |
| SDS Social life/leisure Score | 0.491      | 0.588  | 0.662   | 0.662   |
| SDS Family life Score         | 0.501      | 0.556  | 0.622   | 0.598   |
| PDQ-D-5 Total Score           | 0.484      | 0.582  | 0.751   | 0.627   |
| EQ-5D-5L Index Score          | -0.482     | -0.604 | -0.573  | -0.548  |
| EQ VAS Score                  | -0.276     | -0.552 | -0.644  | -0.549  |
| DSST Score                    | -          | -0.200 | -0.372  | -0.332  |

*Non-significant correlations not shown; N/A not applicable*

**Table e5. Statistically significant correlations between change from baseline in ODQ and the changes in baseline in other clinical measures**

| Measure                       | ODQ    |         |         |
|-------------------------------|--------|---------|---------|
|                               | Week 8 | Week 12 | Week 24 |
| WPAI Presenteeism             | 0.240  | 0.412   | 0.440   |
| WPAI Productivity Loss        | 0.192  | 0.466   | 0.468   |
| WPAI Activity Impairment      | 0.261  | 0.542   | 0.578   |
| MADRS Total Score             | 0.400  | 0.611   | 0.654   |
| MADRS Anhedonia Factor Score  | 0.414  | 0.572   | 0.639   |
| CGI-S Score                   | 0.426  | 0.638   | 0.594   |
| SDS Total Score               | 0.284  | 0.458   | 0.637   |
| SDS Work/School Score         | 0.262  | 0.285   | 0.501   |
| SDS Social life/leisure Score | 0.246  | 0.392   | 0.662   |
| SDS Family life Score         | -      | 0.421   | 0.598   |
| PDQ-D-5 Total Score           | 0.280  | 0.447   | 0.627   |
| EQ-5D-5L Index Score          | -0.296 | -0.445  | -0.548  |
| EQ VAS Score                  | -0.266 | -0.448  | -0.549  |
| DSST Score                    | -      | -       | -0.332  |

*Non-significant correlations not shown.*

**Table e6. Spearman correlation between ODQ Total score and sum of MADRS items related to emotional blunting across all visits**

| MADRS Items                                                                                | Spearman Coefficient | P value |
|--------------------------------------------------------------------------------------------|----------------------|---------|
| [8] Inability to Feel + [6] Concentration Difficulties                                     | 0.611                | p<0.001 |
| [8] Inability to Feel + [6] Concentration Difficulties + [7] Lassitude                     | 0.620                | p<0.001 |
| [8] Inability to Feel + [6] Concentration Difficulties + [4] Reduced Sleep                 | 0.631                | p<0.001 |
| [8] Inability to Feel + [6] Concentration Difficulties + [7] Lassitude + [4] Reduced Sleep | 0.646                | p<0.001 |
